# Supplementary material for: The lure of the big city: smaller Danish rookeries are increasingly associated with urban land cover
Source: Springer Nature journal article supplement (doi:10.1007/s11252-023-01372-6), 2023-06-02
Supplement: MOESM2 [file 25444768]

1 **SUPPLEMENTARY ONLINE MATERIALS**

2 Supplementary material to manuscript: Heldbjerg et al. (2023) The lure of the big city:  
 3 smaller Danish rookeries are increasingly associated with urban land cover

4

5 **Table S1** Classification of all existing thematic geographic information into main land use cover in A:  
 6 2019 and B: 1990, respectively. (Separate file).

7 **Table S2** Result table for generalised linear mixed models fitted to rookery data showing the relationship  
 8 between the arcsine square root transformed proportions of land cover around rookeries and distance  
 9 class, year and colony size. Data for other land cover types are provided in Supplementary Material Table  
 10 S3.

| Land cover type | Explanatory variable | Estimate ± Std.Err  | t-value (df)   | Pr(> t ) |
|-----------------|----------------------|---------------------|----------------|----------|
| <b>Forest</b>   | (Intercept)          | 0.269 ± 0.018       | 15240 (425.0)  | <0.001   |
|                 | Distance             | 0.00001 ± 0.000007  | 2128 (460.4)   | 0.03     |
|                 | Year2021             | -0.013 ± 0.017      | -0.759 (369.6) | 0.45     |
|                 | Pairs                | 0.0001 ± 0.00007    | 1518 (245.2)   | 0.13     |
| <b>Grass</b>    | (Intercept)          | 0.098 ± 0.011       | 9015 (418.4)   | <0.001   |
|                 | Distance             | 0.000009 ± 0.000004 | 2294 (461.8)   | 0.02     |
|                 | Year2021             | 0.158 ± 0.011       | 14959 (403.2)  | <0.001   |
|                 | Pairs                | -0.00002 ± 0.00005  | -0.556 (252.0) | 0.58     |
| <b>Other</b>    | (Intercept)          | 0.134 ± 0.016       | 8305 (412.0)   | <0.001   |
|                 | Distance             | 0.00004 ± 0.000005  | 8717 (461.0)   | <0.001   |
|                 | Year2021             | 0.035 ± 0.015       | 2234 (523.5)   | 0.03     |
|                 | Pairs                | -0.00006 ± 0.00007  | -0.886 (274.6) | 0.38     |

11

12

13 **Table S3** Tabulation of analysis of variance, showing details of the statistical comparisons between arc  
 14 sine square root transformed mean percentage extent of each land use cover type within an area 500 m,  
 15 1000 m and 2000 m out from all rook colonies compared to those within the same distance out from random  
 16 points as summarized in Table 3.

| Year | Distance comparison        | Land use cover type | Parameter | DF  | SumSq  | MeanSq   | F-value | Pr(>F)              |
|------|----------------------------|---------------------|-----------|-----|--------|----------|---------|---------------------|
| 1991 | rookery500m v random500m   | Agriculture         | Distance  | 1   | 8.94   | 8.939    | 60.98   | <0.001***           |
|      |                            |                     | Residuals | 593 | 86.93  | 0.147    |         |                     |
| 1991 | rookery500m v random500m   | Forest              | Distance  | 1   | 0.00   | 0.00097  | 0.008   | 0.928 <sup>ns</sup> |
|      |                            |                     | Residuals | 593 | 71.25  | 0.12016  |         |                     |
| 1991 | rookery500m v random500m   | Grass               | Distance  | 1   | 0.016  | 0.01634  | 1.187   | 0.276 <sup>ns</sup> |
|      |                            |                     | Residuals | 593 | 8165   | 0.01377  |         |                     |
| 1991 | rookery500m v random500m   | Urban               | Distance  | 1   | 8.31   | 8.307    | 109.2   | <0.001***           |
|      |                            |                     | Residuals | 593 | 45.12  | 0.076    |         |                     |
| 1991 | rookery500m v random500m   | Other               | Distance  | 1   | 0.329  | 0.3286   | 15.27   | <0.001***           |
|      |                            |                     | Residuals | 593 | 12.760 | 0.0215   |         |                     |
| 1991 | rookery1000m v random1000m | Agriculture         | Distance  | 1   | 4.26   | 4.256    | 42.98   | <0.001***           |
|      |                            |                     | Residuals | 593 | 58.72  | 0.099    |         |                     |
| 1991 | rookery1000m v random1000m | Forest              | Distance  | 1   | 0.08   | 0.07540  | 1.031   | 0.31 <sup>ns</sup>  |
|      |                            |                     | Residuals | 593 | 43.36  | 0.07312  |         |                     |
| 1991 | rookery1000m v random1000m | Grass               | Distance  | 1   | 0.009  | 0.009314 | 1.075   | 0.3 <sup>ns</sup>   |
|      |                            |                     | Residuals | 593 | 5.139  | 0.008665 |         |                     |
| 1991 | rookery1000m v random1000m | Urban               | Distance  | 1   | 4.727  | 4.727    | 99.35   | <0.001***           |
|      |                            |                     | Residuals | 593 | 28.215 | 0.048    |         |                     |
| 1991 | rookery1000m v random1000m | Other               | Distance  | 1   | 0.584  | 0.5844   | 34.47   | <0.001***           |
|      |                            |                     | Residuals | 593 | 10.053 | 0.0170   |         |                     |
| 1991 | rookery2000m v random2000m | Agriculture         | Distance  | 1   | 2.00   | 20.023   | 31.6    | <0.001***           |
|      |                            |                     | Residuals | 593 | 37.58  | 0.0634   |         |                     |
| 1991 | rookery2000m v random2000m | Forest              | Distance  | 1   | 0.206  | 0.20631  | 4.867   | 0.0278*             |
|      |                            |                     | Residuals | 593 | 25.138 | 0.04239  |         |                     |
| 1991 | rookery2000m v random2000m | Grass               | Distance  | 1   | 0.0069 | 0.006941 | 1.618   | 0.204 <sup>ns</sup> |
|      |                            |                     | Residuals | 593 | 25.440 | 0.004290 |         |                     |
| 1991 | rookery2000m v random2000m | Urban               | Distance  | 1   | 2.621  | 26.211   | 92.28   | <0.001***           |
|      |                            |                     | Residuals | 593 | 16.844 | 0.0284   |         |                     |
| 1991 | rookery2000m v random2000m | Other               | Distance  | 1   | 0.525  | 0.5250   | 39.27   | <0.001***           |
|      |                            |                     | Residuals | 593 | 7.928  | 0.0134   |         |                     |
| 2021 | rookery500m v random500m   | Agriculture         | Distance  | 1   | 19.02  | 19.022   | 154     | <0.001***           |
|      |                            |                     | Residuals | 631 | 77.96  | 0.124    |         |                     |
| 2021 | rookery500m v random500m   | Forest              | Distance  | 1   | 0.35   | 0.3532   | 4.595   | 0.0324*             |
|      |                            |                     | Residuals | 631 | 48.51  | 0.0769   |         |                     |

|      |                            |             |           |     |        |          |       |                     |
|------|----------------------------|-------------|-----------|-----|--------|----------|-------|---------------------|
| 2021 | rookery500m v random500m   | Grass       | Distance  | 1   | 1.70   | 17.003   | 72.31 | <0.001***           |
|      |                            |             | Residuals | 631 | 14.84  | 0.0235   |       |                     |
| 2021 | rookery500m v random500m   | Urban       | Distance  | 1   | 20.50  | 20.499   | 358.1 | <0.001***           |
|      |                            |             | Residuals | 631 | 36.12  | 0.057    |       |                     |
| 2021 | rookery500m v random500m   | Other       | Distance  | 1   | 0.004  | 0.004316 | 0.159 | 0.691 <sup>ns</sup> |
|      |                            |             | Residuals | 631 | 17.171 | 0.027213 |       |                     |
| 2021 | rookery1000m v random1000m | Agriculture | Distance  | 1   | 11.26  | 11.264   | 131.3 | <0.001***           |
|      |                            |             | Residuals | 631 | 54.13  | 0.086    |       |                     |
| 2021 | rookery1000m v random1000m | Forest      | Distance  | 1   | 0.81   | 0.8099   | 16.83 | <0.001***           |
|      |                            |             | Residuals | 631 | 30.36  | 0.0481   |       |                     |
| 2021 | rookery1000m v random1000m | Grass       | Distance  | 1   | 1.116  | 1.116    | 79.94 | <0.001***           |
|      |                            |             | Residuals | 631 | 8.811  | 0.014    |       |                     |
| 2021 | rookery1000m v random1000m | Urban       | Distance  | 1   | 13.99  | 13.991   | 375.4 | <0.001***           |
|      |                            |             | Residuals | 631 | 23.52  | 0.037    |       |                     |
| 2021 | rookery1000m v random1000m | Other       | Distance  | 1   | 0.0    | 0.000125 | 0.006 | 0.94 <sup>ns</sup>  |
|      |                            |             | Residuals | 631 | 13.9   | 0.022036 |       |                     |
| 2021 | rookery2000m v random2000m | Agriculture | Distance  | 1   | 5.78   | 5.779    | 97.1  | <0.001***           |
|      |                            |             | Residuals | 631 | 37.55  | 0.060    |       |                     |
| 2021 | rookery2000m v random2000m | Forest      | Distance  | 1   | 0.499  | 0.4987   | 16.65 | <0.001***           |
|      |                            |             | Residuals | 631 | 18.902 | 0.0300   |       |                     |
| 2021 | rookery2000m v random2000m | Grass       | Distance  | 1   | 0.569  | 0.5691   | 82.66 | <0.001***           |
|      |                            |             | Residuals | 631 | 4.344  | 0.0069   |       |                     |
| 2021 | rookery2000m v random2000m | Urban       | Distance  | 1   | 8.136  | 8.136    | 330.7 | <0.001***           |
|      |                            |             | Residuals | 631 | 15.524 | 0.025    |       |                     |
| 2021 | rookery2000m v random2000m | Other       | Distance  | 1   | 0.009  | 0.00883  | 0.458 | 0.499 <sup>ns</sup> |
|      |                            |             | Residuals | 631 | 12.153 | 0.01926  |       |                     |

18 **Table S4** Table showing the mean percentage areas (and 95% confidence intervals) of the five land cover types  
 19 within 500 m of east Jutland rookeries in 1991 and 2021. Lower table shows results of  $\chi^2$  tests for significance  
 20 differences in land use cover areas between the two years. Comparison of Grass was not possible because of  
 21 different methods of classifying that land use cover between the two years. The direction of difference relative to  
 22 1991 land cover areas are show with level of significance, \*\*\* indicates  $P < 0.001$ , \*  $P < 0.05$ , ns  $P > 0.05$  for one  
 23 degree of freedom in all cases.

|                                 | <b>Agriculture</b>                | <b>Forest</b> | <b>Grass</b> | <b>Urban</b> | <b>Other</b> |
|---------------------------------|-----------------------------------|---------------|--------------|--------------|--------------|
| <b>Rookery size class</b>       | <b>1991 Means</b>                 |               |              |              |              |
| 1-25 (n=29)                     | 43.0 ± 11.3                       | 8.6 ± 4.7     | 2.1 ± 1.7    | 40.2 ± 10.5  | 6.1 ± 3.6    |
| 26-50 (n=10)                    | 35.7 ± 25.1                       | 19.7 ± 19.8   | 2.7 ± 3.1    | 38.0 ± 20.8  | 3.9 ± 5.2    |
| 51-100 (n=20)                   | 40.9 ± 16.8                       | 11.5 ± 7.6    | 1.0 ± 0.8    | 42.5 ± 14.4  | 4.0 ± 4.0    |
| >100 (n=36)                     | 47.2 ± 11.8                       | 17.3 ± 8.0    | 1.8 ± 1.2    | 27.9 ± 9.6   | 5.9 ± 5.8    |
| <b>Rookery size class</b>       | <b>2021 Means</b>                 |               |              |              |              |
| 1-25 (n=67)                     | 18.8 ± 5.8                        | 6.1 ± 1.5     | 9.1 ± 1.5    | 61.4 ± 6.2   | 4.7 ± 1.9    |
| 26-50 (n=21)                    | 35.7 ± 11.0                       | 7.3 ± 5.1     | 9.0 ± 3.7    | 41.1 ± 11.0  | 6.8 ± 5.0    |
| 51-100 (n=11)                   | 28.9 ± 17.9                       | 11.9 ± 9.8    | 6.2 ± 4.0    | 44.5 ± 18.8  | 8.5 ± 8.0    |
| >100 (n=34)                     | 37.2 ± 10.0                       | 14.2 ± 3.8    | 6.7 ± 2.7    | 34.7 ± 9.0   | 7.3 ± 3.9    |
| <b>Rookery size class</b>       | <b><math>\chi^2</math> values</b> |               |              |              |              |
| 1-25                            | 13.63                             | 0.72          | -            | 11.07        | 0.31         |
| 26-50                           | 0.00                              | 7.75          | -            | 0.25         | 2.12         |
| 51-100                          | 3.57                              | 0.02          | -            | 0.09         | 4.98         |
| >100                            | 2.10                              | 0.58          | -            | 1.66         | 0.32         |
| <b>Statistical significance</b> |                                   |               |              |              |              |
| 1-25                            | less***                           | ns            | -            | more***      | ns           |
| 26-50                           | ns                                | less***       | -            | ns           | ns           |
| 51-100                          | ns                                | ns            | -            | ns           | more*        |
| >100                            | ns                                | ns            | -            | ns           | ns           |

24

25

26
